# Supplementary material for: Polycation–Polyanion Architecture of the Intermetallic Compound Mg3−xGa1+xIr
Source: MDPI journal article supplement (doi:10.3390/molecules27030659), 2022-01-20
Supplement: s1 [file s1]

# Supporting information

## Polycation–Polyanion Architecture of the Intermetallic Compound $\text{Mg}_{3-x}\text{Ga}_{1+x}\text{Ir}$

Olga Sichevych, Yurii Prots, Walter Schnelle, Frank R. Wagner and Yuri Grin \*

Max-Planck-Institut für Chemische Physik fester Stoffe, Nöthnitzer Str. 40, 01187 Dresden, Germany; olga.sichevych@cpfs.mpg.de (O.S.); prots@cpfs.mpg.de (Y.P.); schnelle@cpfs.mpg.de (W.S.); Frank.Wagner@cpfs.mpg.de (F.R.W.)

\* Correspondence: grin@cpfs.mpg.de; Fax: +49-351-46464002

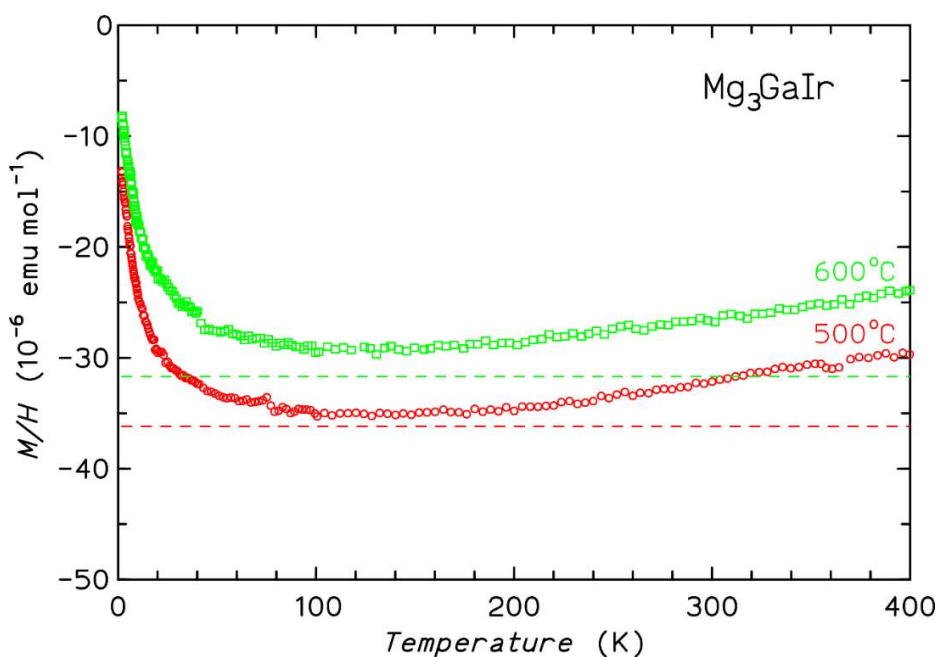

**Figure S1.** Temperature dependent magnetic susceptibility of  $\text{Mg}_{3-x}\text{Ga}_{1+x}\text{Ir}$  annealed at 500 °C and 600 °C.
